# Supplementary material
Source: ML conference proceedings conference paper supplement (https://proceedings.neurips.cc/paper_files/paper/2023/hash/559a0998fab1d19b80e7e43a5852401c-Abstract.html)
Supplement: Supplementary file 1 [file 559a0998fab1d19b80e7e43a5852401c-Supplemental-Conference.zip]

Archive with 3 entries (3 files):
- code/actseg_query_design_multi-class.zip
- pre-survey.pdf
- supplement_5115.pdf
